# Supplementary material for: Twenty Metabolic Genes Based Signature Predicts Survival of Glioma Patients
Source: PubMed Central journal article supplement (PMC6930419; doi:10.7150/jca.30923), 2020-01-01
Supplement: jcav11p0441s1.pdf [file jcav11p0441s1.pdf]

**Table S1.** Function of 20 candidate genes.

| Gene<br>Symbol | Gene Function                                                                                                                                                          | Reference                                                                                  |
|----------------|------------------------------------------------------------------------------------------------------------------------------------------------------------------------|--------------------------------------------------------------------------------------------|
| ALOX5AP        | required for leukotriene synthesis with 5-lipoxygenase<br>catalyzing the last step of the mitochondrial fatty acid                                                     | RefSeq, Feb 2011<br>RefSeq, Jul 2008;                                                      |
| ACAA2          | beta-oxidation spiral, <b>providing a possible linkage<br/>between fatty acid metabolism and apoptosis of cells</b><br>homodimeric protein, catalyzing the cleavage of | PMID: 18371312                                                                             |
| PYGL           | alpha-1,4-glucosidic bonds to release<br>glucose-1-phosphate from liver glycogen stores                                                                                | RefSeq, Feb 2011                                                                           |
| OAS1           | synthesizing 2',5'-oligoadenylates (2-5As), <b>associated<br/>with Lipopolysaccharide-induced cell death</b>                                                           | RefSeq, Feb 2016;<br>PMID: 26516113<br>RefSeq, Jul 2008;                                   |
| NNMT           | responsible for N-methylation, <b>associated with pancreatic<br/>cancer, bladder cancer, ovarian cancer, colorectal cancer,<br/>clear cell Renal cell carcinoma</b>    | PMID: 29974846;<br>PMID: 29148015;<br>PMID: 27323852;<br>PMID: 26942567;<br>PMID: 28412735 |
| FAH            | the last enzyme in the tyrosine catabolism pathway                                                                                                                     | RefSeq, Jul 2008                                                                           |
| EXTL3          | a glycosyltransferase, catalyzing the transfer of<br>N-acetylglucosamine to glycosaminoglycan chains,                                                                  | RefSeq, Nov 2012;<br>PMID: 28132690                                                        |

|          |                                                                                                                                                                     |                                                                           |
|----------|---------------------------------------------------------------------------------------------------------------------------------------------------------------------|---------------------------------------------------------------------------|
|          | <b>associated with neurological abnormality</b>                                                                                                                     |                                                                           |
| B3GALNT1 | beta-1,3-galactosyltransferase, with diverse enzymatic functions, <b>a potential therapy target gene to suppress metastasis in non-small cell lung cancer</b>       | RefSeq, Mar 2017;<br>PMID: 25521548                                       |
| UPP1     | uridine phosphorylase, functioning in the degradation and salvage of pyrimidine ribonucleosides, <b>may be an independent prognostic marker in breast carcinoma</b> | RefSeq, Oct 2016;<br>PMID: 11807789                                       |
| NQO2     | catalyzing the two-electron reduction of quinone substrates, <b>associated with neurodegenerative diseases and several cancers</b>                                  | RefSeq, Mar 2014;<br>PMID: 26609153;<br>PMID: 21803122;<br>PMID: 21351093 |
| MAN1B1   | functioning in N-glycan biosynthesis, <b>associated with poor prognosis and modulating proliferation and apoptosis in bladder cancer</b>                            | RefSeq, Dec 2011;<br>PMID: 30218751                                       |
| CNGA3    | required for normal vision and olfactory signal transduction                                                                                                        | RefSeq, Jul 2008                                                          |
| PIGB     | located in the endoplasmic reticulum and involved in GPI-anchor biosynthesis                                                                                        | RefSeq, Jul 2008                                                          |
| HEXA     | catalyzing molecules containing terminal N-acetyl hexosamines, <b>associated with prostate cancer</b>                                                               | RefSeq, Jan 2016;<br>PMID: 24389457                                       |
| CYB561   | a senescence-associated gene in normal human oral keratinocytes, associated with the adrenergic pathway                                                             | PMID: 24140660;<br>PMID: 12837283                                         |

|         |                                                                                                                                                                                 |                                     |
|---------|---------------------------------------------------------------------------------------------------------------------------------------------------------------------------------|-------------------------------------|
| ACADS   | catalyzing the initial step of the mitochondrial fatty acid<br>beta-oxidation pathway                                                                                           | RefSeq, Oct 2014                    |
| NPC2    | functioning in regulating the transport of cholesterol,<br><b>associated with Niemann-Pick disease, type C2 and<br/>frontal lobe atrophy</b>                                    | RefSeq, Jul 2008;<br>PMID: 27792009 |
| SLC12A7 | <b>associated with adrenocortical carcinoma tumorigenesis<br/>and gynecological cancers</b>                                                                                     | PMID: 26454676;<br>PMID: 15262997   |
| ACOX2   | involved in the degradation of long branched fatty acids<br>and bile acid intermediates in peroxisomes, <b>a potential<br/>novel therapeutic biomarker in ER+ breast tumors</b> | RefSeq, Mar 2009;<br>PMID: 26183823 |
| B4GALT7 | beta-1,4-galactosyltransferase, associated with the<br>progeroid form of Ehlers-Danlos syndrome                                                                                 | RefSeq, Oct 2009;<br>PMID: 20809901 |

---

The gene functions marked in bold in the table show the possibility that the gene is associated with glioma.
